# Supplementary material
Source: PubMed Central journal article supplement (PMC5446636)
Supplement: JVI.00046-17_zjv999182675s1.pdf [file JVI.00046-17_zjv999182675s1.pdf]

## Supporting Material

### Unique structural features of influenza H15 HA

Netanel Tzarum,<sup>1</sup> Ryan McBride,<sup>2</sup> Corwin M. Nycholat<sup>2</sup>, James C. Paulson,<sup>2,3#</sup>

Ian A. Wilson<sup>1,4#</sup>

<sup>1</sup>Department of Integrative Structural and Computational Biology,

<sup>2</sup>Department of Molecular Medicine

<sup>3</sup>Department of Immunology and Microbiology

<sup>4</sup>Skaggs Institute for Chemical Biology,

The Scripps Research Institute, La Jolla, California, USA

# Correspondence: wilson@scripps.edu; jpaulson@scripps.edu







|                                 |                                                    |     |     |     |     |
|---------------------------------|----------------------------------------------------|-----|-----|-----|-----|
|                                 | 110                                                | 120 | 130 | 140 | 150 |
| H15N9_A/shearwater/WA/2576/1979 | AMENQHTIDLADSEMNKLYERVRRLRENAEEDGTGCFEIFHRCDDQCME  |     |     |     |     |
| H3N2_A/Hong_Kong/1/1968         | ALENQHITDLTDSEMKNLFEKTRRQLRENAEDMGNGCFKIYHKCDNACIE |     |     |     |     |
| H7N9_A/Shanghai/02/2013         | AMENQHTIDLADSEMDKLYERVKRQLRENAEEDGTGCFEIFHKCDDDCMA |     |     |     |     |
| H10N8_A/Jiangxi/IPB13a/2013     | AMENQHTIDMADSEMLNLYERVRKQLRQNAEEDGKGCFEIYHACDDSCME |     |     |     |     |
|                                 |                                                    |     |     |     |     |
|                                 | 160                                                | 170 |     |     |     |
| H15N9_A/shearwater/WA/2576/1979 | SIRNNTYNHTEYRQEALQNRIMINPV                         |     |     |     |     |
| H3N2_A/Hong_Kong/1/1968         | SIRNGTYDHDVYRDEALNNRFQIKGV                         |     |     |     |     |
| H7N9_A/Shanghai/02/2013         | SIRNNTYDHSKYREEAMQNRIQIDPV                         |     |     |     |     |
| H10N8_A/Jiangxi/IPB13a/2013     | SIRNNTYDHSQYREEALLNRLNINPV                         |     |     |     |     |

**FIG S1** Sequence alignment of A/shearwater/WA/2576/1979 H15N9 HA with other H15 HAs and H3, H7 and H10 HAs. (A) Alignment of HA sequences of H15 viruses that are available in the databases [NCBI Influenza Virus Resource and the Global Initiative on Sharing All Influenza Data (GISAID)]. (B) Alignment of HA sequence of the A/shearwater/WA/2576/1979 H15N9 HA with HA sequences from A/Hong\_Kong/1/1968 (H3N2), A/Shanghai/02/2013 (H7N9) and A/Jiangxi/IPB13a/2013 (H10N8). The conserved structural elements of the HA RBS (130-loop, 150-loop, 190-helix and 220-loop) and the extended 260-loop are indicated and the highly conserved residues of the receptor binding site (Y95, W153, H183, E190, Y195, G225, Q226 and G228) are highlighted in bold (H3 numbering).

**Table S1** Glycans imprinted on the sialoside array. Non-sialylated controls #1-10 are in gray, avian-type receptors #11-79 in yellow and human-type receptors #80-135 in green. The Common Name column lists glycan sequences and linkers in IUPAC format except for abbreviations of synthetic structures 68, 132-135 described elsewhere (1). Purple diamonds represent NeuAc, yellow circles represent Gal, blue circles represent Glc, green circles represent Man, yellow squares represent GalNAc, blue squares represent GlcNAc, red triangles represent Fuc and light blue diamonds represent NeuGc.

| Glycan # | Common Name                                                                                                                                                                                                                                                                 | Structure                                                                             |
|----------|-----------------------------------------------------------------------------------------------------------------------------------------------------------------------------------------------------------------------------------------------------------------------------|---------------------------------------------------------------------------------------|
| 1        | Gal $\beta$ (1-4)GlcNAc $\beta$ -ethyl-NH <sub>2</sub>                                                                                                                                                                                                                      |    |
| 2        | Gal $\beta$ (1-4)GlcNAc $\beta$ (1-3)Gal $\beta$ (1-3)GalNAc $\alpha$ -Thr-NH <sub>2</sub>                                                                                                                                                                                  |    |
| 3        | Gal $\beta$ (1-4)GlcNAc $\beta$ (1-6)[Gal $\beta$ (1-3)]-GalNAc $\alpha$ -Thr-NH <sub>2</sub>                                                                                                                                                                               |    |
| 4        | Gal $\beta$ (1-4)GlcNAc $\beta$ (1-3)GalNAc $\alpha$ -Thr-NH <sub>2</sub>                                                                                                                                                                                                   |    |
| 5        | Gal $\beta$ (1-4)GlcNAc $\beta$ (1-3)[Gal $\beta$ (1-4)GlcNAc $\beta$ (1-6)]-GalNAc $\alpha$ -Thr-NH <sub>2</sub>                                                                                                                                                           |    |
| 6        | Gal $\beta$ (1-4)GlcNAc $\beta$ (1-6)GalNAc $\alpha$ -Thr-NH <sub>2</sub>                                                                                                                                                                                                   |    |
| 7        | Gal $\beta$ (1-4)GlcNAc $\beta$ (1-2)Man $\alpha$ (1-3)[Gal $\beta$ (1-4)GlcNAc $\beta$ (1-2)Man $\alpha$ (1-6)]-Man $\beta$ (1-4)GlcNAc $\beta$ (1-4)GlcNAc $\beta$ -Asn-NH <sub>2</sub>                                                                                   |    |
| 8        | Gal $\beta$ (1-4)GlcNAc $\beta$ (1-2)Man $\alpha$ (1-3)[Gal $\beta$ (1-4)GlcNAc $\beta$ (1-2)Man $\alpha$ (1-6)]-Man $\beta$ (1-4)GlcNAc $\beta$ (1-4)[Fuc $\alpha$ (1-6)]-GlcNAc $\beta$ -Asn-Ser-Thr-NH <sub>2</sub>                                                      |    |
| 9        | Gal $\beta$ (1-4)GlcNAc $\beta$ (1-2)Man $\alpha$ (1-3){Gal $\beta$ (1-4)GlcNAc $\beta$ (1-2)[Gal $\beta$ (1-4)GlcNAc $\beta$ (1-2)]-Man $\alpha$ (1-6)}-Man $\beta$ (1-4)GlcNAc $\beta$ (1-4)GlcNAc $\beta$ -Asn-Lys-NH <sub>2</sub>                                       |   |
| 10       | Gal $\beta$ (1-4)GlcNAc $\beta$ (1-2)Man $\alpha$ (1-3){Gal $\beta$ (1-4)GlcNAc $\beta$ (1-2)[Gal $\beta$ (1-4)GlcNAc $\beta$ (1-2)]-Man $\alpha$ (1-6)}-Man $\beta$ (1-4)GlcNAc $\beta$ (1-4)[Fuc $\alpha$ (1-6)]-GlcNAc $\beta$ -(Lys-Val-Ala)Asn-Lys-Thr-NH <sub>2</sub> |  |
| 11       | NeuAc $\alpha$ (2-3)Gal $\beta$ (1-4)6-O-sulfo-GlcNAc $\beta$ -propyl-NH <sub>2</sub>                                                                                                                                                                                       |  |
| 12       | NeuAc $\alpha$ (2-3)Gal $\beta$ (1-4)[Fuc $\alpha$ (1-3)]-6-O-sulfo-GlcNAc $\beta$ -propyl-NH <sub>2</sub>                                                                                                                                                                  |  |
| 13       | NeuAc $\alpha$ (2-3)6-O-sulfo-Gal $\beta$ (1-4)GlcNAc $\beta$ -ethyl-NH <sub>2</sub>                                                                                                                                                                                        |  |
| 14       | NeuAc $\alpha$ (2-3)6-O-sulfo-Gal $\beta$ (1-4)[Fuc $\alpha$ (1-3)]-GlcNAc $\beta$ -propyl-NH <sub>2</sub>                                                                                                                                                                  |  |
| 15       | NeuAc $\alpha$ (2-3)Gal $\beta$ (1-3)6-O-sulfo-GlcNAc $\beta$ -propyl-NH <sub>2</sub>                                                                                                                                                                                       |  |
| 16       | NeuAc $\alpha$ (2-3)Gal $\beta$ (1-4)Glc $\beta$ -ethyl-NH <sub>2</sub>                                                                                                                                                                                                     |  |
| 17       | NeuAc $\alpha$ (2-3)Gal $\beta$ (1-4)GlcNAc $\beta$ -ethyl-NH <sub>2</sub>                                                                                                                                                                                                  |  |
| 18       | NeuAc $\alpha$ (2-3)Gal $\beta$ (1-4)GlcNAc $\beta$ (1-3)Gal $\beta$ (1-4)GlcNAc $\beta$ -ethyl-NH <sub>2</sub>                                                                                                                                                             |  |
| 19       | NeuAc $\alpha$ (2-3)Gal $\beta$ (1-4)GlcNAc $\beta$ (1-3)Gal $\beta$ (1-4)GlcNAc $\beta$ (1-3)Gal $\beta$ (1-4)GlcNAc $\beta$ -ethyl-NH <sub>2</sub>                                                                                                                        |  |
| 20       | NeuAc $\alpha$ (2-3)GalNAc $\beta$ (1-4)GlcNAc $\beta$ -ethyl-NH <sub>2</sub>                                                                                                                                                                                               |  |

| Glycan # | Common Name                                                                                                                                                                                                                                                        | Structure |
|----------|--------------------------------------------------------------------------------------------------------------------------------------------------------------------------------------------------------------------------------------------------------------------|-----------|
| 21       | NeuAc $\alpha$ (2-3)Gal $\beta$ (1-3)GlcNAc $\beta$ -ethyl-NH <sub>2</sub>                                                                                                                                                                                         |           |
| 22       | NeuAc $\alpha$ (2-3)Gal $\beta$ (1-3)GlcNAc $\beta$ (1-3)Gal $\beta$ (1-4)GlcNAc $\beta$ -ethyl-NH <sub>2</sub>                                                                                                                                                    |           |
| 23       | NeuAc $\alpha$ (2-3)Gal $\beta$ (1-3)GlcNAc $\beta$ (1-3)Gal $\beta$ (1-3)GlcNAc $\beta$ -ethyl-NH <sub>2</sub>                                                                                                                                                    |           |
| 24       | NeuAc $\alpha$ (2-3)Gal $\beta$ (1-3)GalNAc $\beta$ (1-3)Gal $\alpha$ (1-4)Gal $\beta$ (1-4)Glc $\beta$ -ethyl-NH <sub>2</sub>                                                                                                                                     |           |
| 25       | NeuAc $\alpha$ (2-3)Gal $\beta$ (1-3)GalNAc $\alpha$ -Thr-NH <sub>2</sub>                                                                                                                                                                                          |           |
| 26       | NeuAc $\alpha$ (2-3)Gal $\beta$ (1-4)GlcNAc $\beta$ (1-3)Gal $\beta$ (1-3)GalNAc $\alpha$ -Thr-NH <sub>2</sub>                                                                                                                                                     |           |
| 27       | NeuAc $\alpha$ (2-3)Gal $\beta$ (1-4)GlcNAc $\beta$ (1-3)Gal $\beta$ (1-4)GlcNAc $\beta$ (1-3)Gal $\beta$ (1-3)GalNAc $\alpha$ -Thr-NH <sub>2</sub>                                                                                                                |           |
| 28       | NeuAc $\alpha$ (2-3)Gal $\beta$ (1-4)GlcNAc $\beta$ (1-3)Gal $\beta$ (1-4)GlcNAc $\beta$ (1-3)Gal $\beta$ (1-4)GlcNAc $\beta$ (1-3)Gal $\beta$ (1-3)GalNAc $\alpha$ -Thr-NH <sub>2</sub>                                                                           |           |
| 29       | NeuAc $\alpha$ (2-3)Gal $\beta$ (1-4)GlcNAc $\beta$ (1-3)Gal $\beta$ (1-4)GlcNAc $\beta$ (1-3)Gal $\beta$ (1-4)GlcNAc $\beta$ (1-3)Gal $\beta$ (1-4)GlcNAc $\beta$ (1-3)Gal $\beta$ (1-3)GalNAc $\alpha$ -Thr-NH <sub>2</sub>                                      |           |
| 30       | NeuAc $\alpha$ (2-3)Gal $\beta$ (1-4)GlcNAc $\beta$ (1-3)Gal $\beta$ (1-3)GalNAc $\alpha$ -Thr-NH <sub>2</sub> |           |
| 31       | NeuAc $\alpha$ (2-3)Gal $\beta$ (1-3)[GlcNAc $\beta$ (1-6)]-GalNAc $\alpha$ -Thr-NH <sub>2</sub>                                                                                                                                                                   |           |
| 32       | NeuAc $\alpha$ (2-3)Gal $\beta$ (1-4)GlcNAc $\beta$ (1-6)[Gal $\beta$ (1-3)]-GalNAc $\alpha$ -Thr-NH <sub>2</sub>                                                                                                                                                  |           |
| 33       | NeuAc $\alpha$ (2-3)Gal $\beta$ (1-4)GlcNAc $\beta$ (1-3)Gal $\beta$ (1-4)GlcNAc $\beta$ (1-6)[Gal $\beta$ (1-3)]-GalNAc $\alpha$ -Thr-NH <sub>2</sub>                                                                                                             |           |
| 34       | NeuAc $\alpha$ (2-3)Gal $\beta$ (1-4)GlcNAc $\beta$ (1-3)Gal $\beta$ (1-4)GlcNAc $\beta$ (1-3)Gal $\beta$ (1-4)GlcNAc $\beta$ (1-6)[Gal $\beta$ (1-3)]-GalNAc $\alpha$ -Thr-NH <sub>2</sub>                                                                        |           |
| 35       | NeuAc $\alpha$ (2-3)Gal $\beta$ (1-4)GlcNAc $\beta$ (1-3)Gal $\beta$ (1-4)GlcNAc $\beta$ (1-3)Gal $\beta$ (1-4)GlcNAc $\beta$ (1-3)Gal $\beta$ (1-4)GlcNAc $\beta$ (1-6)[Gal $\beta$ (1-3)]-GalNAc $\alpha$ -Thr-NH <sub>2</sub>                                   |           |
| 36       | NeuAc $\alpha$ (2-3)Gal $\beta$ (1-4)GlcNAc $\beta$ (1-3)Gal $\beta$ (1-4)GlcNAc $\beta$ (1-3)Gal $\beta$ (1-4)GlcNAc $\beta$ (1-3)Gal $\beta$ (1-4)GlcNAc $\beta$ (1-6)[Gal $\beta$ (1-3)]-GalNAc $\alpha$ -Thr-NH <sub>2</sub>                                   |           |





| Glycan # | Common Name                                                                                                                                                                                                                                                                                                                                                                                                                                  | Structure |
|----------|----------------------------------------------------------------------------------------------------------------------------------------------------------------------------------------------------------------------------------------------------------------------------------------------------------------------------------------------------------------------------------------------------------------------------------------------|-----------|
| 48       | NeuAc $\alpha$ (2-3)Gal $\beta$ (1-4)GlcNAc $\beta$ (1-3)Gal $\beta$ (1-4)GlcNAc $\beta$ (1-6)]-GalNAc $\alpha$ -Thr-NH <sub>2</sub> |           |
| 49       | NeuAc $\alpha$ (2-3)Gal $\beta$ (1-4)GlcNAc $\beta$ (1-3)Gal $\beta$ (1-4)GlcNAc $\beta$ (1-6)]GalNAc $\alpha$ -Thr-NH <sub>2</sub>                                                                                                                                                      |           |
| 50       | NeuAc $\alpha$ (2-3)Gal $\beta$ (1-4)GlcNAc $\beta$ (1-3)Gal $\beta$ (1-4)GlcNAc $\beta$ (1-6)]GalNAc $\alpha$ -Thr-NH <sub>2</sub>                                                                                                                 |           |
| 51       | NeuAc $\alpha$ (2-3)Gal $\beta$ (1-3)GlcNAc $\beta$ (1-3)Gal $\beta$ (1-4)GlcNAc $\beta$ (1-6)]NeuAc $\alpha$ (2-3)Gal $\beta$ (1-3)GlcNAc $\beta$ (1-3)]Gal $\beta$ (1-4)GlcNAc $\beta$ -ethyl-NH <sub>2</sub>                                                                                                                                                                                                                              |           |
| 52       | NeuAc $\alpha$ (2-3)Gal $\beta$ (1-4)GlcNAc $\beta$ (1-3)Gal $\beta$ (1-4)GlcNAc $\beta$ (1-3)Gal $\beta$ (1-4)GlcNAc $\beta$ (1-6)]NeuAc $\alpha$ (2-3)Gal $\beta$ (1-4)GlcNAc $\beta$ (1-3)Gal $\beta$ (1-4)GlcNAc $\beta$ (1-3)]Gal $\beta$ (1-4)GlcNAc $\beta$ -ethyl-NH <sub>2</sub>                                                                                                                                                    |           |
| 53       | NeuAc $\alpha$ (2-3)Gal $\beta$ (1-4)GlcNAc $\beta$ (1-2)Man $\alpha$ (1-3)]NeuAc $\alpha$ (2-3)Gal $\beta$ (1-4)GlcNAc $\beta$ (1-2)Man $\alpha$ (1-6)]-Man $\beta$ (1-4)GlcNAc $\beta$ (1-4)GlcNAc $\beta$ -Asn-NH <sub>2</sub>                                                                                                                                                                                                            |           |
| 54       | NeuAc $\alpha$ (2-3)Gal $\beta$ (1-4)GlcNAc $\beta$ (1-3)Gal $\beta$ (1-4)GlcNAc $\beta$ (1-2)Man $\alpha$ (1-3)]NeuAc $\alpha$ (2-3)Gal $\beta$ (1-4)GlcNAc $\beta$ (1-3)Gal $\beta$ (1-4)GlcNAc $\beta$ (1-2)Man $\alpha$ (1-6)]-Man $\beta$ (1-4)GlcNAc $\beta$ (1-4)GlcNAc $\beta$ -Asn-NH <sub>2</sub>                                                                                                                                  |           |
| 55       | NeuAc $\alpha$ (2-3)Gal $\beta$ (1-4)GlcNAc $\beta$ (1-3)Gal $\beta$ (1-4)GlcNAc $\beta$ (1-3)Gal $\beta$ (1-4)GlcNAc $\beta$ (1-2)Man $\alpha$ (1-3)]NeuAc $\alpha$ (2-3)Gal $\beta$ (1-4)GlcNAc $\beta$ (1-3)Gal $\beta$ (1-4)GlcNAc $\beta$ (1-3)Gal $\beta$ (1-4)GlcNAc $\beta$ (1-2)Man $\alpha$ (1-6)]-Man $\beta$ (1-4)GlcNAc $\beta$ (1-4)GlcNAc $\beta$ -Asn-NH <sub>2</sub>                                                        |           |
| 56       | NeuAc $\alpha$ (2-3)Gal $\beta$ (1-4)GlcNAc $\beta$ (1-3)Gal $\beta$ (1-4)GlcNAc $\beta$ (1-2)Man $\alpha$ (1-3)]NeuAc $\alpha$ (2-3)Gal $\beta$ (1-4)GlcNAc $\beta$ (1-3)Gal $\beta$ (1-4)GlcNAc $\beta$ (1-2)Man $\alpha$ (1-6)]-Man $\beta$ (1-4)GlcNAc $\beta$ (1-4)GlcNAc $\beta$ -Asn-Lys-Thr-NH <sub>2</sub>                                                                                                                          |           |
| 57       | NeuAc $\alpha$ (2-3)Gal $\beta$ (1-4)GlcNAc $\beta$ (1-3)Gal $\beta$ (1-4)GlcNAc $\beta$ (1-3)Gal $\beta$ (1-4)GlcNAc $\beta$ (1-2)Man $\alpha$ (1-3)]NeuAc $\alpha$ (2-3)Gal $\beta$ (1-4)GlcNAc $\beta$ (1-3)Gal $\beta$ (1-4)GlcNAc $\beta$ (1-3)Gal $\beta$ (1-4)GlcNAc $\beta$ (1-2)Man $\alpha$ (1-6)]-Man $\beta$ (1-4)GlcNAc $\beta$ (1-4)GlcNAc $\beta$ -Asn-Lys-Thr-NH <sub>2</sub>                                                |           |

| Glycan # | Common Name                                                                                                                                                                                                                                                                                                                                                                                                                                                                                                               | Structure |
|----------|---------------------------------------------------------------------------------------------------------------------------------------------------------------------------------------------------------------------------------------------------------------------------------------------------------------------------------------------------------------------------------------------------------------------------------------------------------------------------------------------------------------------------|-----------|
| 58       | NeuAc $\alpha$ (2-3)Gal $\beta$ (1-4)GlcNAc $\beta$ (1-3)Gal $\beta$ (1-4)GlcNAc $\beta$ (1-3)Gal $\beta$ (1-4)GlcNAc $\beta$ (1-3)Gal $\beta$ (1-4)GlcNAc $\beta$ (1-2)Man $\alpha$ (1-3)[NeuAc $\alpha$ (2-3)Gal $\beta$ (1-4)GlcNAc $\beta$ (1-3)Gal $\beta$ (1-4)GlcNAc $\beta$ (1-3)Gal $\beta$ (1-4)GlcNAc $\beta$ (1-3)Gal $\beta$ (1-4)GlcNAc $\beta$ (1-2)Man $\alpha$ (1-6)]-Man $\beta$ (1-4)GlcNAc $\beta$ (1-4)GlcNAc $\beta$ -(Lys-Val-Ala)Asn-Lys-Thr-NH <sub>2</sub>                                      |           |
| 59       | NeuAc $\alpha$ (2-3)Gal $\beta$ (1-4)GlcNAc $\beta$ (1-3)Gal $\beta$ (1-4)GlcNAc $\beta$ (1-3)Gal $\beta$ (1-4)GlcNAc $\beta$ (1-3)Gal $\beta$ (1-4)GlcNAc $\beta$ (1-2)Man $\alpha$ (1-3)[NeuAc $\alpha$ (2-3)Gal $\beta$ (1-4)GlcNAc $\beta$ (1-3)Gal $\beta$ (1-4)GlcNAc $\beta$ (1-3)Gal $\beta$ (1-4)GlcNAc $\beta$ (1-3)Gal $\beta$ (1-4)GlcNAc $\beta$ (1-3)Gal $\beta$ (1-4)GlcNAc $\beta$ (1-2)Man $\alpha$ (1-6)]-Man $\beta$ (1-4)GlcNAc $\beta$ (1-4)GlcNAc $\beta$ -(Lys-Val-Ala)Asn-Lys-Thr-NH <sub>2</sub> |           |
| 60       | NeuAc $\alpha$ (2-3)Gal $\beta$ (1-4)GlcNAc $\beta$ (1-3)Gal $\beta$ (1-4)GlcNAc $\beta$ (1-3)Gal $\beta$ (1-4)GlcNAc $\beta$ (1-2)Man $\alpha$ (1-3)[NeuAc $\alpha$ (2-3)Gal $\beta$ (1-4)GlcNAc $\beta$ (1-3)Gal $\beta$ (1-4)GlcNAc $\beta$ (1-3)Gal $\beta$ (1-4)GlcNAc $\beta$ (1-2)Man $\alpha$ (1-6)]-Man $\beta$ (1-4)GlcNAc $\beta$ (1-4)[Fuc $\alpha$ (1-6)]-GlcNAc $\beta$ -(Lys-Val-Ala)Asn-Lys-Thr-NH <sub>2</sub>                                                                                           |           |
| 61       | NeuAc $\alpha$ (2-3)Gal $\beta$ (1-4)GlcNAc $\beta$ (1-3)Gal $\beta$ (1-4)GlcNAc $\beta$ (1-3)Gal $\beta$ (1-4)GlcNAc $\beta$ (1-2)Man $\alpha$ (1-3)[NeuAc $\alpha$ (2-3)Gal $\beta$ (1-4)GlcNAc $\beta$ (1-3)Gal $\beta$ (1-4)GlcNAc $\beta$ (1-3)Gal $\beta$ (1-4)GlcNAc $\beta$ (1-3)Gal $\beta$ (1-4)GlcNAc $\beta$ (1-2)Man $\alpha$ (1-6)]-Man $\beta$ (1-4)GlcNAc $\beta$ (1-4)[Fuc $\alpha$ (1-6)]-GlcNAc $\beta$ -(Lys-Val-Ala)Asn-Lys-Thr-NH <sub>2</sub>                                                      |           |
| 62       | NeuAc $\alpha$ (2-3)Gal $\beta$ (1-4)GlcNAc $\beta$ (1-3)Gal $\beta$ (1-4)GlcNAc $\beta$ (1-2)Man $\alpha$ (1-3)[NeuAc $\alpha$ (2-3)Gal $\beta$ (1-4)GlcNAc $\beta$ (1-3)Gal $\beta$ (1-4)GlcNAc $\beta$ (1-2)[NeuAc $\alpha$ (2-3)Gal $\beta$ (1-4)GlcNAc $\beta$ (1-3)Gal $\beta$ (1-4)GlcNAc $\beta$ (1-6)Man $\alpha$ (1-6)]-Man $\beta$ (1-4)GlcNAc $\beta$ (1-4)GlcNAc $\beta$ -(Lys-Val-Ala)Asn-Lys-Thr-NH <sub>2</sub>                                                                                           |           |

| Glycan # | Common Name                                                                                                                                                                                                                                                                                                                                                                                                                                                                                                                                                                                                              | Structure |
|----------|--------------------------------------------------------------------------------------------------------------------------------------------------------------------------------------------------------------------------------------------------------------------------------------------------------------------------------------------------------------------------------------------------------------------------------------------------------------------------------------------------------------------------------------------------------------------------------------------------------------------------|-----------|
| 63       | NeuAc $\alpha$ (2-3)Gal $\beta$ (1-4)GlcNAc $\beta$ (1-3)Gal $\beta$ (1-4)GlcNAc $\beta$ (1-3)Gal $\beta$ (1-4)GlcNAc $\beta$ (1-2)Man $\alpha$ (1-3){NeuAc $\alpha$ (2-3)Gal $\beta$ (1-4)GlcNAc $\beta$ (1-3)Gal $\beta$ (1-4)GlcNAc $\beta$ (1-3)Gal $\beta$ (1-4)GlcNAc $\beta$ (1-2)[NeuAc $\alpha$ (2-3)Gal $\beta$ (1-4)GlcNAc $\beta$ (1-3)Gal $\beta$ (1-4)GlcNAc $\beta$ (1-3)Gal $\beta$ (1-4)GlcNAc $\beta$ (1-6)Man $\alpha$ (1-6)]-Man $\beta$ (1-4)GlcNAc $\beta$ (1-4)GlcNAc $\beta$ -(Lys-Val-Ala)Asn-Lys-Thr-NH <sub>2</sub>                                                                           |           |
| 64       | NeuAc $\alpha$ (2-3)Gal $\beta$ (1-4)GlcNAc $\beta$ (1-3)Gal $\beta$ (1-4)GlcNAc $\beta$ (1-3)Gal $\beta$ (1-4)GlcNAc $\beta$ (1-2)Man $\alpha$ (1-3){NeuAc $\alpha$ (2-3)Gal $\beta$ (1-4)GlcNAc $\beta$ (1-3)Gal $\beta$ (1-4)GlcNAc $\beta$ (1-3)Gal $\beta$ (1-4)GlcNAc $\beta$ (1-3)Gal $\beta$ (1-4)GlcNAc $\beta$ (1-2)[NeuAc $\alpha$ (2-3)Gal $\beta$ (1-4)GlcNAc $\beta$ (1-3)Gal $\beta$ (1-4)GlcNAc $\beta$ (1-3)Gal $\beta$ (1-4)GlcNAc $\beta$ (1-3)Gal $\beta$ (1-4)GlcNAc $\beta$ (1-6)Man $\alpha$ (1-6)]-Man $\beta$ (1-4)GlcNAc $\beta$ (1-4)GlcNAc $\beta$ -(Lys-Val-Ala)Asn-Lys-Thr-NH <sub>2</sub> |           |
| 65       | NeuAc $\alpha$ (2-3)Gal $\beta$ (1-4)GlcNAc $\beta$ (1-3)Gal $\beta$ (1-4)GlcNAc $\beta$ (1-2)Man $\alpha$ (1-3){NeuAc $\alpha$ (2-3)Gal $\beta$ (1-4)GlcNAc $\beta$ (1-3)Gal $\beta$ (1-4)GlcNAc $\beta$ (1-2)[NeuAc $\alpha$ (2-3)Gal $\beta$ (1-4)GlcNAc $\beta$ (1-3)Gal $\beta$ (1-4)GlcNAc $\beta$ (1-6)Man $\alpha$ (1-6)]-Man $\beta$ (1-4)GlcNAc $\beta$ (1-4)[Fuc $\alpha$ (1-6)]-GlcNAc $\beta$ -(Lys-Val-Ala)Asn-Lys-Thr-NH <sub>2</sub>                                                                                                                                                                     |           |
| 66       | NeuAc $\alpha$ (2-3)Gal $\beta$ (1-4)GlcNAc $\beta$ (1-3)Gal $\beta$ (1-4)GlcNAc $\beta$ (1-3)Gal $\beta$ (1-4)GlcNAc $\beta$ (1-2)Man $\alpha$ (1-3)(6)-Man $\beta$ (1-4)GlcNAc $\beta$ (1-4)[Fuc $\alpha$ (1-6)]-GlcNAc $\beta$ -(Lys-Val-Ala)Asn-Lys-Thr-NH <sub>2</sub>                                                                                                                                                                                                                                                                                                                                              |           |
| 67       | NeuAc $\alpha$ (2-3)Gal $\beta$ (1-4)GlcNAc $\beta$ (1-3)Gal $\beta$ (1-4)GlcNAc $\beta$ (1-3)Gal $\beta$ (1-4)GlcNAc $\beta$ (1-2)Man $\alpha$ (1-3){NeuAc $\alpha$ (2-3)Gal $\beta$ (1-4)GlcNAc $\beta$ (1-3)Gal $\beta$ (1-4)GlcNAc $\beta$ (1-3)Gal $\beta$ (1-4)GlcNAc $\beta$ (1-2)[NeuAc $\alpha$ (2-3)Gal $\beta$ (1-4)GlcNAc $\beta$ (1-3)Gal $\beta$ (1-4)GlcNAc $\beta$ (1-3)Gal $\beta$ (1-4)GlcNAc $\beta$ (1-6)Man $\alpha$ (1-6)]-Man $\beta$ (1-4)GlcNAc $\beta$ (1-4)[Fuc $\alpha$ (1-6)]-GlcNAc $\beta$ -(Lys-Val-Ala)Asn-Lys-Thr-NH <sub>2</sub>                                                      |           |
| 68       | Gn/3'SLN/3'SLN-TriN                                                                                                                                                                                                                                                                                                                                                                                                                                                                                                                                                                                                      |           |



| Glycan # | Common Name                                                                                                                                                                                                                                                                                                                                                                             | Structure |
|----------|-----------------------------------------------------------------------------------------------------------------------------------------------------------------------------------------------------------------------------------------------------------------------------------------------------------------------------------------------------------------------------------------|-----------|
| 84       | NeuAc $\alpha$ (2-6)Gal $\beta$ (1-4)GlcNAc $\beta$ (1-3)Gal $\beta$ (1-4)GlcNAc $\beta$ -ethyl-NH <sub>2</sub>                                                                                                                                                                                                                                                                         |           |
| 85       | NeuAc $\alpha$ (2-6)Gal $\beta$ (1-4)GlcNAc $\beta$ (1-3)Gal $\beta$ (1-4)GlcNAc $\beta$ (1-3)Gal $\beta$ (1-4)GlcNAc $\beta$ -ethyl-NH <sub>2</sub>                                                                                                                                                                                                                                    |           |
| 86       | NeuAc $\alpha$ (2-6)GalNAc $\beta$ (1-4)GlcNAc $\beta$ -ethyl-NH <sub>2</sub>                                                                                                                                                                                                                                                                                                           |           |
| 87       | NeuAc $\alpha$ (2-6)Gal $\beta$ (1-4)GlcNAc $\beta$ (1-3)Gal $\beta$ (1-3)GalNAc $\alpha$ -Thr-NH <sub>2</sub>                                                                                                                                                                                                                                                                          |           |
| 88       | NeuAc $\alpha$ (2-6)Gal $\beta$ (1-4)GlcNAc $\beta$ (1-3)Gal $\beta$ (1-4)GlcNAc $\beta$ (1-3)Gal $\beta$ (1-3)GalNAc $\alpha$ -Thr-NH <sub>2</sub>                                                                                                                                                                                                                                     |           |
| 89       | NeuAc $\alpha$ (2-6)Gal $\beta$ (1-4)GlcNAc $\beta$ (1-3)Gal $\beta$ (1-4)GlcNAc $\beta$ (1-3)Gal $\beta$ (1-4)GlcNAc $\beta$ (1-3)Gal $\beta$ (1-3)GalNAc $\alpha$ -Thr-NH <sub>2</sub>                                                                                                                                                                                                |           |
| 90       | NeuAc $\alpha$ (2-6)Gal $\beta$ (1-4)GlcNAc $\beta$ (1-3)Gal $\beta$ (1-4)GlcNAc $\beta$ (1-3)Gal $\beta$ (1-4)GlcNAc $\beta$ (1-3)Gal $\beta$ (1-4)GlcNAc $\beta$ (1-3)Gal $\beta$ (1-3)GalNAc $\alpha$ -Thr-NH <sub>2</sub>                                                                                                                                                           |           |
| 91       | NeuAc $\alpha$ (2-6)Gal $\beta$ (1-4)GlcNAc $\beta$ (1-3)Gal $\beta$ (1-3)GalNAc $\alpha$ -Thr-NH <sub>2</sub>                                                                                                                      |           |
| 92       | NeuAc $\alpha$ (2-6)Gal $\beta$ (1-4)GlcNAc $\beta$ (1-6)[Gal $\beta$ (1-3)]-GalNAc $\alpha$ -Thr-NH <sub>2</sub>                                                                                                                                                                                                                                                                       |           |
| 93       | NeuAc $\alpha$ (2-6)Gal $\beta$ (1-4)GlcNAc $\beta$ (1-3)Gal $\beta$ (1-4)GlcNAc $\beta$ (1-6)[Gal $\beta$ (1-3)]-GalNAc $\alpha$ -Thr-NH <sub>2</sub>                                                                                                                                                                                                                                  |           |
| 94       | NeuAc $\alpha$ (2-6)Gal $\beta$ (1-4)GlcNAc $\beta$ (1-3)Gal $\beta$ (1-4)GlcNAc $\beta$ (1-3)Gal $\beta$ (1-4)GlcNAc $\beta$ (1-6)[Gal $\beta$ (1-3)]-GalNAc $\alpha$ -Thr-NH <sub>2</sub>                                                                                                                                                                                             |           |
| 95       | NeuAc $\alpha$ (2-6)Gal $\beta$ (1-4)GlcNAc $\beta$ (1-3)Gal $\beta$ (1-4)GlcNAc $\beta$ (1-3)Gal $\beta$ (1-4)GlcNAc $\beta$ (1-6)[Gal $\beta$ (1-3)]-GalNAc $\alpha$ -Thr-NH <sub>2</sub>                                                                                                                                                                                             |           |
| 96       | NeuAc $\alpha$ (2-6)Gal $\beta$ (1-4)GlcNAc $\beta$ (1-3)Gal $\beta$ (1-4)GlcNAc $\beta$ (1-3)Gal $\beta$ (1-4)GlcNAc $\beta$ (1-3)Gal $\beta$ (1-4)GlcNAc $\beta$ (1-6)[Gal $\beta$ (1-3)]-GalNAc $\alpha$ -Thr-NH <sub>2</sub>                                                                                                                                                        |           |
| 97       | NeuAc $\alpha$ (2-6)Gal $\beta$ (1-4)GlcNAc $\beta$ (1-3)Gal $\beta$ (1-4)GlcNAc $\beta$ (1-3)Gal $\beta$ (1-4)GlcNAc $\beta$ (1-3)Gal $\beta$ (1-4)GlcNAc $\beta$ (1-6)[Gal $\beta$ (1-3)]-GalNAc $\alpha$ (2-6)Gal $\beta$ (1-4)GlcNAc $\beta$ (1-3)Gal $\beta$ (1-4)GlcNAc $\beta$ (1-3)Gal $\beta$ (1-4)GlcNAc $\beta$ (1-3)Gal $\beta$ (1-3)]-GalNAc $\alpha$ -Thr-NH <sub>2</sub> |           |



| Glycan # | Common Name                                                                                                                                                                                                                                                                                                                                                                                                | Structure |
|----------|------------------------------------------------------------------------------------------------------------------------------------------------------------------------------------------------------------------------------------------------------------------------------------------------------------------------------------------------------------------------------------------------------------|-----------|
| 110      | NeuAc $\alpha$ (2-6)Gal $\beta$ (1-4)GlcNAc $\beta$ (1-3)Gal $\beta$ (1-4)GlcNAc $\beta$ (1-3)Gal $\beta$ (1-4)GlcNAc $\beta$ (1-3)Gal $\beta$ (1-4)GlcNAc $\beta$ (1-3)Gal $\beta$ (1-4)GlcNAc $\beta$ (1-6)GalNAc $\alpha$ -Thr-NH <sub>2</sub>                                                                                                                                                          |           |
| 111      | NeuAc $\alpha$ (2-6)Gal $\beta$ (1-4)GlcNAc $\beta$ (1-3)Gal $\beta$ (1-4)GlcNAc $\beta$ (1-3)Gal $\beta$ (1-4)GlcNAc $\beta$ (1-6)[NeuAc $\alpha$ (2-6)Gal $\beta$ (1-4)GlcNAc $\beta$ (1-3)Gal $\beta$ (1-4)GlcNAc $\beta$ (1-3)]Gal $\beta$ (1-4)GlcNAc $\beta$ -ethyl-NH <sub>2</sub>                                                                                                                  |           |
| 112      | NeuAc $\alpha$ (2-6)Gal $\beta$ (1-3)GlcNAc $\beta$ (1-3)Gal $\beta$ (1-4)GlcNAc $\beta$ (1-6)[NeuAc $\alpha$ (2-6)Gal $\beta$ (1-3)GlcNAc $\beta$ (1-3)]Gal $\beta$ (1-4)GlcNAc $\beta$ -ethyl-NH <sub>2</sub>                                                                                                                                                                                            |           |
| 113      | Gal $\beta$ (1-4)GlcNAc $\beta$ (1-2)Man $\alpha$ (1-3)[NeuAc $\alpha$ (2-6)Gal $\beta$ (1-4)GlcNAc $\beta$ (1-2)Man $\alpha$ (1-6)]-Man $\beta$ (1-4)GlcNAc $\beta$ (1-4)GlcNAc $\beta$ -Asn-NH <sub>2</sub>                                                                                                                                                                                              |           |
| 114      | NeuAc $\alpha$ (2-6)Gal $\beta$ (1-4)GlcNAc $\beta$ (1-2)Man $\alpha$ (1-3)[Gal $\beta$ (1-4)GlcNAc $\beta$ (1-2)Man $\alpha$ (1-6)]-Man $\beta$ (1-4)GlcNAc $\beta$ (1-4)GlcNAc $\beta$ -Asn-NH <sub>2</sub>                                                                                                                                                                                              |           |
| 115      | GlcNAc $\beta$ (1-2)Man $\alpha$ (1-3)[NeuAc $\alpha$ (2-6)Gal $\beta$ (1-4)GlcNAc $\beta$ (1-2)Man $\alpha$ (1-6)]-Man $\beta$ (1-4)GlcNAc $\beta$ (1-4)GlcNAc $\beta$ -Asn-NH <sub>2</sub>                                                                                                                                                                                                               |           |
| 116      | NeuAc $\alpha$ (2-6)Gal $\beta$ (1-4)GlcNAc $\beta$ (1-2)Man $\alpha$ (1-3)[NeuAc $\alpha$ (2-6)Gal $\beta$ (1-4)GlcNAc $\beta$ (1-2)Man $\alpha$ (1-6)]-Man $\beta$ (1-4)GlcNAc $\beta$ (1-4)GlcNAc $\beta$ -Asn-NH <sub>2</sub>                                                                                                                                                                          |           |
| 117      | NeuAc $\alpha$ (2-6)Gal $\beta$ (1-4)GlcNAc $\beta$ (1-3)Gal $\beta$ (1-4)GlcNAc $\beta$ (1-2)Man $\alpha$ (1-3)[NeuAc $\alpha$ (2-6)Gal $\beta$ (1-4)GlcNAc $\beta$ (1-3)Gal $\beta$ (1-4)GlcNAc $\beta$ (1-2)Man $\alpha$ (1-6)]-Man $\beta$ (1-4)GlcNAc $\beta$ (1-4)GlcNAc $\beta$ -Asn-NH <sub>2</sub>                                                                                                |           |
| 118      | NeuAc $\alpha$ (2-6)Gal $\beta$ (1-4)GlcNAc $\beta$ (1-3)Gal $\beta$ (1-4)GlcNAc $\beta$ (1-2)Man $\alpha$ (1-3)[NeuAc $\alpha$ (2-6)Gal $\beta$ (1-4)GlcNAc $\beta$ (1-3)Gal $\beta$ (1-4)GlcNAc $\beta$ (1-2)Man $\alpha$ (1-6)]-Man $\beta$ (1-4)GlcNAc $\beta$ (1-4)GlcNAc $\beta$ -(Lys-Val-Ala)Asn-Lys-Thr-NH <sub>2</sub>                                                                           |           |
| 119      | NeuAc $\alpha$ (2-6)Gal $\beta$ (1-4)GlcNAc $\beta$ (1-3)Gal $\beta$ (1-4)GlcNAc $\beta$ (1-3)Gal $\beta$ (1-4)GlcNAc $\beta$ (1-2)Man $\alpha$ (1-3)[NeuAc $\alpha$ (2-6)Gal $\beta$ (1-4)GlcNAc $\beta$ (1-3)Gal $\beta$ (1-4)GlcNAc $\beta$ (1-3)Gal $\beta$ (1-4)GlcNAc $\beta$ (1-2)Man $\alpha$ (1-6)]-Man $\beta$ (1-4)GlcNAc $\beta$ (1-4)GlcNAc $\beta$ -Asn-NH <sub>2</sub>                      |           |
| 120      | NeuAc $\alpha$ (2-6)Gal $\beta$ (1-4)GlcNAc $\beta$ (1-3)Gal $\beta$ (1-4)GlcNAc $\beta$ (1-3)Gal $\beta$ (1-4)GlcNAc $\beta$ (1-2)Man $\alpha$ (1-3)[NeuAc $\alpha$ (2-6)Gal $\beta$ (1-4)GlcNAc $\beta$ (1-3)Gal $\beta$ (1-4)GlcNAc $\beta$ (1-3)Gal $\beta$ (1-4)GlcNAc $\beta$ (1-2)Man $\alpha$ (1-6)]-Man $\beta$ (1-4)GlcNAc $\beta$ (1-4)GlcNAc $\beta$ -(Lys-Val-Ala)Asn-Lys-Thr-NH <sub>2</sub> |           |



| Glycan # | Common Name                                                                                                                                                                                                                                                                                                                                                                                                                                                                                                                                                    | Structure |
|----------|----------------------------------------------------------------------------------------------------------------------------------------------------------------------------------------------------------------------------------------------------------------------------------------------------------------------------------------------------------------------------------------------------------------------------------------------------------------------------------------------------------------------------------------------------------------|-----------|
| 121      | NeuAc $\alpha$ (2-6)Gal $\beta$ (1-4)GlcNAc $\beta$ (1-3)Gal $\beta$ (1-4)GlcNAc $\beta$ (1-3)Gal $\beta$ (1-4)GlcNAc $\beta$ (1-3)Gal $\beta$ (1-4)GlcNAc $\beta$ (1-2)Man $\alpha$ (1-3)[NeuAc $\alpha$ (2-6)Gal $\beta$ (1-4)GlcNAc $\beta$ (1-3)Gal $\beta$ (1-4)GlcNAc $\beta$ (1-3)Gal $\beta$ (1-4)GlcNAc $\beta$ (1-3)Gal $\beta$ (1-4)GlcNAc $\beta$ (1-2)Man $\alpha$ (1-6)]-Man $\beta$ (1-4)GlcNAc $\beta$ (1-4)GlcNAc $\beta$ -(Lys-Val-Ala)Asn-Lys-Thr-NH <sub>2</sub>                                                                           |           |
| 122      | NeuAc $\alpha$ (2-6)Gal $\beta$ (1-4)GlcNAc $\beta$ (1-3)Gal $\beta$ (1-4)GlcNAc $\beta$ (1-3)Gal $\beta$ (1-4)GlcNAc $\beta$ (1-3)Gal $\beta$ (1-4)GlcNAc $\beta$ (1-3)Gal $\beta$ (1-4)GlcNAc $\beta$ (1-2)Man $\alpha$ (1-3)[NeuAc $\alpha$ (2-6)Gal $\beta$ (1-4)GlcNAc $\beta$ (1-3)Gal $\beta$ (1-4)GlcNAc $\beta$ (1-3)Gal $\beta$ (1-4)GlcNAc $\beta$ (1-3)Gal $\beta$ (1-4)GlcNAc $\beta$ (1-3)Gal $\beta$ (1-4)GlcNAc $\beta$ (1-2)Man $\alpha$ (1-6)]-Man $\beta$ (1-4)GlcNAc $\beta$ (1-4)GlcNAc $\beta$ -(Lys-Val-Ala)Asn-Lys-Thr-NH <sub>2</sub> |           |
| 123      | NeuAc $\alpha$ (2-6)Gal $\beta$ (1-4)GlcNAc $\beta$ (1-3)Gal $\beta$ (1-4)GlcNAc $\beta$ (1-2)Man $\alpha$ (1-3)[NeuAc $\alpha$ (2-6)Gal $\beta$ (1-4)GlcNAc $\beta$ (1-3)Gal $\beta$ (1-4)GlcNAc $\beta$ (1-2)Man $\alpha$ (1-6)]-Man $\beta$ (1-4)GlcNAc $\beta$ (1-4)[Fuc $\alpha$ (1-6)]-GlcNAc $\beta$ -(Lys-Val-Ala)Asn-Lys-Thr-NH <sub>2</sub>                                                                                                                                                                                                          |           |
| 124      | NeuAc $\alpha$ (2-6)Gal $\beta$ (1-4)GlcNAc $\beta$ (1-3)Gal $\beta$ (1-4)GlcNAc $\beta$ (1-3)Gal $\beta$ (1-4)GlcNAc $\beta$ (1-2)Man $\alpha$ (1-3)[NeuAc $\alpha$ (2-6)Gal $\beta$ (1-4)GlcNAc $\beta$ (1-3)Gal $\beta$ (1-4)GlcNAc $\beta$ (1-3)Gal $\beta$ (1-4)GlcNAc $\beta$ (1-2)Man $\alpha$ (1-6)]-Man $\beta$ (1-4)GlcNAc $\beta$ (1-4)[Fuc $\alpha$ (1-6)]-GlcNAc $\beta$ -(Lys-Val-Ala)Asn-Lys-Thr-NH <sub>2</sub>                                                                                                                                |           |
| 125      | NeuAc $\alpha$ (2-6)Gal $\beta$ (1-4)GlcNAc $\beta$ (1-3)Gal $\beta$ (1-4)GlcNAc $\beta$ (1-3)Gal $\beta$ (1-4)GlcNAc $\beta$ (1-3)Gal $\beta$ (1-4)GlcNAc $\beta$ (1-2)Man $\alpha$ (1-3)[NeuAc $\alpha$ (2-6)Gal $\beta$ (1-4)GlcNAc $\beta$ (1-3)Gal $\beta$ (1-4)GlcNAc $\beta$ (1-3)Gal $\beta$ (1-4)GlcNAc $\beta$ (1-3)Gal $\beta$ (1-4)GlcNAc $\beta$ (1-2)Man $\alpha$ (1-6)]-Man $\beta$ (1-4)GlcNAc $\beta$ (1-4)[Fuc $\alpha$ (1-6)]-GlcNAc $\beta$ -(Lys-Val-Ala)Asn-Lys-Thr-NH <sub>2</sub>                                                      |           |
| 126      | NeuAc $\alpha$ (2-6)Gal $\beta$ (1-4)GlcNAc $\beta$ (1-3)Gal $\beta$ (1-4)GlcNAc $\beta$ (1-2)Man $\alpha$ (1-3){NeuAc $\alpha$ (2-6)Gal $\beta$ (1-4)GlcNAc $\beta$ (1-3)Gal $\beta$ (1-4)GlcNAc $\beta$ (1-2)[NeuAc $\alpha$ (2-6)Gal $\beta$ (1-4)GlcNAc $\beta$ (1-3)Gal $\beta$ (1-4)GlcNAc $\beta$ (1-6)Man $\alpha$ (1-6)]}-Man $\beta$ (1-4)GlcNAc $\beta$ (1-4)GlcNAc $\beta$ -(Lys-Val-Ala)Asn-Lys-Thr-NH <sub>2</sub>                                                                                                                               |           |

| Glycan # | Common Name                                                                                                                                                                                                                                                                                                                                                                                                                                                                                                                                                                         | Structure |
|----------|-------------------------------------------------------------------------------------------------------------------------------------------------------------------------------------------------------------------------------------------------------------------------------------------------------------------------------------------------------------------------------------------------------------------------------------------------------------------------------------------------------------------------------------------------------------------------------------|-----------|
| 127      | NeuAc $\alpha$ (2-6)Gal $\beta$ (1-4)GlcNAc $\beta$ (1-3)Gal $\beta$ (1-4)GlcNAc $\beta$ (1-3)Gal $\beta$ (1-4)GlcNAc $\beta$ (1-2)Man $\alpha$ (1-3){NeuAc $\alpha$ (2-6)Gal $\beta$ (1-4)GlcNAc $\beta$ (1-3)Gal $\beta$ (1-4)GlcNAc $\beta$ (1-3)Gal $\beta$ (1-4)GlcNAc $\beta$ (1-2)[NeuAc $\alpha$ (2-6)Gal $\beta$ (1-4)GlcNAc $\beta$ (1-3)Gal $\beta$ (1-4)GlcNAc $\beta$ (1-3)Gal $\beta$ (1-4)GlcNAc $\beta$ (1-6)Man $\alpha$ (1-6)]-Man $\beta$ (1-4)GlcNAc $\beta$ (1-4)GlcNAc $\beta$ -(Lys-Val-Ala)Asn-Lys-Thr-NH <sub>2</sub>                                      |           |
| 128      | NeuAc $\alpha$ (2-6)Gal $\beta$ (1-4)GlcNAc $\beta$ (1-3)Gal $\beta$ (1-4)GlcNAc $\beta$ (1-3)Gal $\beta$ (1-4)GlcNAc $\beta$ (1-2)Man $\alpha$ (1-3){NeuAc $\alpha$ (2-6)Gal $\beta$ (1-4)GlcNAc $\beta$ (1-3)Gal $\beta$ (1-4)GlcNAc $\beta$ (1-3)Gal $\beta$ (1-4)GlcNAc $\beta$ (1-3)Gal $\beta$ (1-4)GlcNAc $\beta$ (1-2)[NeuAc $\alpha$ (2-6)Gal $\beta$ (1-4)GlcNAc $\beta$ (1-3)Gal $\beta$ (1-4)GlcNAc $\beta$ (1-3)Gal $\beta$ (1-4)GlcNAc $\beta$ (1-6)Man $\alpha$ (1-6)]-Man $\beta$ (1-4)GlcNAc $\beta$ (1-4)GlcNAc $\beta$ -(Lys-Val-Ala)Asn-Lys-Thr-NH <sub>2</sub> |           |
| 129      | NeuAc $\alpha$ (2-6)Gal $\beta$ (1-4)GlcNAc $\beta$ (1-3)Gal $\beta$ (1-4)GlcNAc $\beta$ (1-2)Man $\alpha$ (1-3){NeuAc $\alpha$ (2-6)Gal $\beta$ (1-4)GlcNAc $\beta$ (1-3)Gal $\beta$ (1-4)GlcNAc $\beta$ (1-2)[NeuAc $\alpha$ (2-6)Gal $\beta$ (1-4)GlcNAc $\beta$ (1-3)Gal $\beta$ (1-4)GlcNAc $\beta$ (1-6)Man $\alpha$ (1-6)]-Man $\beta$ (1-4)GlcNAc $\beta$ (1-4)[Fuc $\alpha$ (1-6)]-GlcNAc $\beta$ -(Lys-Val-Ala)Asn-Lys-Thr-NH <sub>2</sub>                                                                                                                                |           |
| 130      | NeuAc $\alpha$ (2-6)Gal $\beta$ (1-4)GlcNAc $\beta$ (1-3)Gal $\beta$ (1-4)GlcNAc $\beta$ (1-3)Gal $\beta$ (1-4)GlcNAc $\beta$ (1-2)Man $\alpha$ (1-3){NeuAc $\alpha$ (2-6)Gal $\beta$ (1-4)GlcNAc $\beta$ (1-3)Gal $\beta$ (1-4)GlcNAc $\beta$ (1-3)Gal $\beta$ (1-4)GlcNAc $\beta$ (1-2)[NeuAc $\alpha$ (2-6)Gal $\beta$ (1-4)GlcNAc $\beta$ (1-3)Gal $\beta$ (1-4)GlcNAc $\beta$ (1-6)Man $\alpha$ (1-6)]-Man $\beta$ (1-4)GlcNAc $\beta$ (1-4)[Fuc $\alpha$ (1-6)]-GlcNAc $\beta$ -(Lys-Val-Ala)Asn-Lys-Thr-NH <sub>2</sub>                                                      |           |

| Glycan # | Common Name                                                                                                                                                                                                                                                                                                                                                                                                                                                                                                                                                                                                                                                                                                                                                            | Structure |
|----------|------------------------------------------------------------------------------------------------------------------------------------------------------------------------------------------------------------------------------------------------------------------------------------------------------------------------------------------------------------------------------------------------------------------------------------------------------------------------------------------------------------------------------------------------------------------------------------------------------------------------------------------------------------------------------------------------------------------------------------------------------------------------|-----------|
| 131      | <p>NeuAc<math>\alpha</math>(2-6)Gal<math>\beta</math>(1-4)GlcNAc<math>\beta</math>(1-3)Gal<math>\beta</math>(1-4)GlcNAc<math>\beta</math>(1-3)Gal<math>\beta</math>(1-4)GlcNAc<math>\beta</math>(1-2)Man<math>\alpha</math>(1-3){NeuAc<math>\alpha</math>(2-6)Gal<math>\beta</math>(1-4)GlcNAc<math>\beta</math>(1-3)Gal<math>\beta</math>(1-4)GlcNAc<math>\beta</math>(1-3)Gal<math>\beta</math>(1-4)GlcNAc<math>\beta</math>(1-2)[NeuAc<math>\alpha</math>(2-6)Gal<math>\beta</math>(1-4)GlcNAc<math>\beta</math>(1-3)Gal<math>\beta</math>(1-4)GlcNAc<math>\beta</math>(1-6)Man<math>\alpha</math>(1-6)]}-Man<math>\beta</math>(1-4)GlcNAc<math>\beta</math>(1-4)[Fuc<math>\alpha</math>(1-6)]-GlcNAc<math>\beta</math>-(Lys-Val-Ala)Asn-Lys-Thr-NH<sub>2</sub></p> |           |
| 132      | LN/6'SLN/6'SLN-TriN                                                                                                                                                                                                                                                                                                                                                                                                                                                                                                                                                                                                                                                                                                                                                    |           |
| 133      | 6'SLNLN/6'SLN/6'SLN-TriN                                                                                                                                                                                                                                                                                                                                                                                                                                                                                                                                                                                                                                                                                                                                               |           |
| 134      | 6'SLN/LeX/LeX-TriN                                                                                                                                                                                                                                                                                                                                                                                                                                                                                                                                                                                                                                                                                                                                                     |           |
| 135      | 6'SLNLN/LeX/LeX-TriN                                                                                                                                                                                                                                                                                                                                                                                                                                                                                                                                                                                                                                                                                                                                                   |           |

## References

1. **Wang Z, Chinoy ZS, Ambre SG, Peng W, McBride R, de Vries RP, Glushka J, Paulson JC, Boons GJ.** 2013. A general strategy for the chemoenzymatic synthesis of asymmetrically branched N-glycans. *Science* **341**:379-383.
